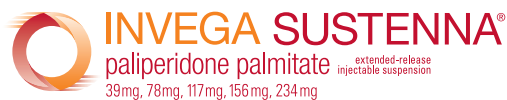

# See why it's **THE #1 PRESCRIBED** long-acting injectable atypical antipsychotic for adults with schizophrenia<sup>1\*</sup>

Consider once-monthly INVEGA SUSTENNA<sup>®</sup> for your adult patients with schizophrenia...

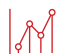

INVEGA SUSTENNA<sup>®</sup> has clinical evidence compared to a group of oral antipsychotics for adults recently diagnosed with schizophrenia within 1 to 5 years<sup>2††</sup>

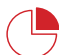

INVEGA SUSTENNA<sup>®</sup> was evaluated in 4 short-term, double-blind, randomized, placebo-controlled pivotal trials and 1 longer-term, double-blind, placebo-controlled pivotal trial<sup>3</sup>

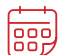

INVEGA SUSTENNA<sup>®</sup> was compared to a group of commonly prescribed oral antipsychotics in a study with a real world design<sup>4††</sup>

...and for your adult patients with schizoaffective disorder

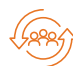

INVEGA SUSTENNA<sup>®</sup> was evaluated in a long-term schizoaffective disorder study vs placebo both as a monotherapy and as an adjunctive therapy<sup>3§</sup>

\*These data have not been verified for patients with schizoaffective disorder.

†All patients were diagnosed 1 to 5 years previously with  $\geq 2$  relapses requiring hospitalization.

††The study was not powered to compare the efficacy of INVEGA SUSTENNA<sup>®</sup> with that of individual oral antipsychotics.

§Adjunct to antidepressants or mood stabilizers. 39 mg strength was not studied in the long-term schizoaffective disorder study.

¶Real world as defined by patient selection and clinically meaningful outcome measures.

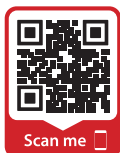

Scan to view safety and efficacy data for adults with **schizophrenia** or visit [InvegaSustennaHCP.com](http://InvegaSustennaHCP.com)

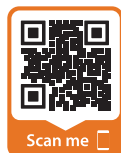

Scan to view safety and efficacy data for adults with **schizoaffective disorder** or visit [InvegaSustennaHCP.com/efficacy-schizoaffective](http://InvegaSustennaHCP.com/efficacy-schizoaffective)

## INDICATION

INVEGA SUSTENNA<sup>®</sup> (paliperidone palmitate) is indicated for the treatment of:

- Schizophrenia in adults.
- Schizoaffective disorder as monotherapy and as an adjunct to mood stabilizers or antidepressants in adults.

## IMPORTANT SAFETY INFORMATION FOR INVEGA SUSTENNA<sup>®</sup> (paliperidone palmitate)

### WARNING: INCREASED MORTALITY IN ELDERLY PATIENTS WITH DEMENTIA-RELATED PSYCHOSIS

*See full prescribing information for complete Boxed Warning.*

Elderly patients with dementia-related psychosis treated with antipsychotic drugs are at an increased risk of death. INVEGA SUSTENNA<sup>®</sup> is not approved for use in patients with dementia-related psychosis.

Please see additional Important Safety Information and Brief Summary of the full Prescribing Information for INVEGA SUSTENNA<sup>®</sup> on following pages of this advertisement.

## IMPORTANT SAFETY INFORMATION (cont'd)

**Contraindications:** INVEGA SUSTENNA® is contraindicated in patients with a known hypersensitivity to either paliperidone, risperidone, or to any excipients of the INVEGA SUSTENNA® formulation.

**Cerebrovascular Adverse Reactions:** Cerebrovascular adverse reactions (e.g., stroke, transient ischemic attacks), including fatalities, were reported at a higher incidence in elderly patients with dementia-related psychosis taking risperidone, aripiprazole, and olanzapine compared to placebo. No studies have been conducted with oral paliperidone, INVEGA SUSTENNA®, or the 3-month paliperidone palmitate extended-release injectable suspension in elderly patients with dementia. These medicines are not approved for the treatment of patients with dementia-related psychosis.

**Neuroleptic Malignant Syndrome (NMS):** NMS, a potentially fatal symptom complex, has been reported in association with antipsychotic drugs, including paliperidone.

Clinical manifestations of NMS are hyperpyrexia, muscle rigidity, altered mental status including delirium, and autonomic instability (irregular pulse or blood pressure, tachycardia, diaphoresis, and cardiac dysrhythmia). Additional signs may include elevated creatine phosphokinase, myoglobinuria (rhabdomyolysis), and acute renal failure.

If NMS is suspected, immediately discontinue INVEGA SUSTENNA® and provide symptomatic treatment and monitoring.

**QT Prolongation:** Paliperidone causes a modest increase in the corrected QT (QTc) interval. Avoid the use of drugs that also increase QTc interval and in patients with risk factors for prolonged QTc interval. Paliperidone should also be avoided in patients with congenital long QT syndrome and in patients with a history of cardiac arrhythmias. Certain circumstances may increase the risk of the occurrence of torsades de pointes and/or sudden death in association with the use of drugs that prolong the QTc interval.

**Tardive Dyskinesia (TD):** TD, a syndrome consisting of potentially irreversible, involuntary, dyskinetic movements, may develop in patients treated with antipsychotic drugs. Although the prevalence of the syndrome appears to be highest among the elderly, especially elderly women, it is impossible to predict which patients will develop the syndrome. Whether antipsychotic drug products differ in their potential to cause tardive dyskinesia is unknown.

The risk of developing TD and the likelihood that it will become irreversible appear to increase with the duration of treatment and the cumulative dose. The syndrome can develop after relatively brief treatment periods, even at low doses. It may also occur after discontinuation. TD may remit, partially or completely, if antipsychotic treatment is discontinued. Antipsychotic treatment itself, however, may suppress (or partially suppress) the signs and symptoms of the syndrome, possibly masking the underlying process. The effect that symptomatic suppression has upon the long-term course of the syndrome is unknown.

If signs and symptoms of TD appear in a patient on INVEGA SUSTENNA®, drug discontinuation should be considered. However, some patients may require treatment with INVEGA SUSTENNA® despite the presence of the syndrome. In patients who do require chronic treatment, use the lowest dose and the shortest duration of treatment producing a satisfactory clinical response. Periodically reassess the need for continued treatment.

**Metabolic Changes:** Atypical antipsychotic drugs have been associated with metabolic changes that may increase cardiovascular/cerebrovascular risk. These metabolic changes include hyperglycemia, dyslipidemia, and body weight gain. While all of the drugs in the class have been shown to produce some metabolic changes, each drug has its own specific risk profile.

**Hyperglycemia and Diabetes Mellitus:** Hyperglycemia and diabetes mellitus, in some cases extreme and associated with ketoacidosis, hyperosmolar coma or death, have been reported in patients treated with all atypical antipsychotics (APS). Patients starting treatment with APS who have or are at risk for diabetes mellitus should undergo fasting blood glucose testing at the beginning of and during treatment. Patients who develop symptoms of hyperglycemia during treatment should also undergo fasting blood glucose testing. All patients treated with atypical antipsychotics should be monitored for symptoms of hyperglycemia. Some patients require continuation of antidiabetic treatment despite discontinuation of the suspect drug.

**Dyslipidemia:** Undesirable alterations have been observed in patients treated with atypical antipsychotics.

**Weight Gain:** Weight gain has been observed with atypical antipsychotic use. Clinical monitoring of weight is recommended.

**Orthostatic Hypotension and Syncope:** INVEGA SUSTENNA® may induce orthostatic hypotension in some patients due to its alpha-adrenergic blocking activity. INVEGA SUSTENNA® should be used with caution in patients with known cardiovascular disease, cerebrovascular disease or conditions that would predispose patients to hypotension (e.g., dehydration, hypovolemia, treatment with antihypertensive medications). Monitoring should be considered in patients for whom this may be of concern.

**Falls:** Somnolence, postural hypotension, motor and sensory instability have been reported with the use of antipsychotics, including INVEGA SUSTENNA®, which may lead to falls and, consequently, fractures or other fall-related injuries. For patients, particularly the elderly, with diseases, conditions, or medications that could exacerbate these effects, assess the risk of falls when initiating

antipsychotic treatment and recurrently for patients on long-term antipsychotic therapy.

**Leukopenia, Neutropenia and Agranulocytosis** have been reported with antipsychotics, including INVEGA SUSTENNA®. In patients with a history of clinically significant low white blood cell count (WBC)/absolute neutrophil count (ANC) or drug-induced leukopenia/neutropenia, perform a complete blood count frequently during the first few months of therapy. Consider discontinuing INVEGA SUSTENNA® at the first sign of a clinically significant decline in WBC in the absence of other causative factors. Monitor patients with clinically significant neutropenia for fever or other symptoms or signs of infection and treat promptly if such symptoms or signs occur. Discontinue INVEGA SUSTENNA® in patients with severe neutropenia (absolute neutrophil count <1000/mm<sup>3</sup>) and follow their WBC until recovery.

**Hyperprolactinemia:** As with other drugs that antagonize dopamine D<sub>2</sub> receptors, INVEGA SUSTENNA® elevates prolactin levels, and the elevation persists during chronic administration. Paliperidone has a prolactin-elevating effect similar to risperidone, which is associated with higher levels of prolactin elevation than other antipsychotic agents.

**Potential for Cognitive and Motor Impairment:** Somnolence, sedation, and dizziness were reported as adverse reactions in subjects treated with INVEGA SUSTENNA®.

INVEGA SUSTENNA® has the potential to impair judgment, thinking, or motor skills. Patients should be cautioned about performing activities that require mental alertness such as operating hazardous machinery, including motor vehicles, until they are reasonably certain that INVEGA SUSTENNA® does not adversely affect them.

**Seizures:** INVEGA SUSTENNA® should be used cautiously in patients with a history of seizures or with conditions that potentially lower seizure threshold. Conditions that lower seizure threshold may be more prevalent in patients 65 years or older.

**Administration:** For intramuscular injection only by a healthcare professional using only the needles provided in the INVEGA SUSTENNA® kit. Care should be taken to avoid inadvertent injection into a blood vessel.

**Drug Interactions:** Strong CYP3A4/P-glycoprotein (P-gp) inducers: Avoid using a strong inducer of CYP3A4 and/or P-gp (e.g. carbamazepine, rifampin, St. John's Wort) during a dosing interval for INVEGA SUSTENNA®. If administering a strong inducer is necessary, consider managing the patient using paliperidone extended-release tablets.

**Pregnancy/Nursing:** INVEGA SUSTENNA® may cause extrapyramidal and/or withdrawal symptoms in neonates with third trimester exposure. Advise patients to notify their healthcare professional if they become pregnant or intend to become pregnant during treatment with INVEGA SUSTENNA®. Patients should be advised that there is a pregnancy registry that monitors outcomes in women exposed to INVEGA SUSTENNA® during pregnancy. INVEGA SUSTENNA® can pass into human breast milk. The benefits of breastfeeding should be considered along with the mother's clinical need for INVEGA SUSTENNA® and any potential adverse effects on the breastfed infant from INVEGA SUSTENNA® or the mother's underlying condition.

**Commonly Observed Adverse Reactions for INVEGA SUSTENNA®:** The most common adverse reactions in clinical trials in patients with schizophrenia (≥5% and twice placebo) were injection site reactions, somnolence/sedation, dizziness, akathisia and extrapyramidal disorder. No adverse events occurred at a rate of ≥5% and twice placebo during the 15-month double-blind, placebo-controlled study in patients with schizoaffective disorder. The following adverse reactions occurred more frequently (a ≥2% difference vs. placebo) in the long-term study in patients with schizoaffective disorder: weight increased, nasopharyngitis, headache, hyperprolactinemia, and pyrexia.

**Before prescribing INVEGA SUSTENNA®, please review the full Prescribing Information, including Boxed WARNING, available at [www.InvegaSustenna.com](http://www.InvegaSustenna.com). Please see Brief Summary of full Prescribing Information on following pages of this advertisement.**

cp-64202v3

**REFERENCES:** 1. IQVIA Real World Data. Longitudinal Prescription (LRx) and Medical Claims (Dx) in schizophrenia in adults; September 2020–August 2021. 2. Schreiner A, Aadamsoo K, Altamura AC, et al. Paliperidone palmitate versus oral antipsychotics in recently diagnosed schizophrenia. *Schizophr Res*. 2015;169(1-3):393-399. 3. INVEGA SUSTENNA® [Prescribing Information]. Titusville, NJ: Janssen Pharmaceuticals, Inc.; August 2021. 4. Alphas L, Benson C, Cheshire-Kinney K, et al. Real-world outcomes of paliperidone palmitate compared to daily oral antipsychotic therapy in schizophrenia: a randomized, open-label, review board-blinded 15-month study. *J Clin Psychiatry*. 2015;76(5):554-561.

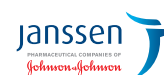

## INVEGA SUSTENNA®

(paliperidone palmitate) extended-release injectable suspension, for intramuscular use

### Brief Summary

**BEFORE PRESCRIBING INVEGA SUSTENNA®, PLEASE SEE FULL PRESCRIBING INFORMATION, INCLUDING BOXED WARNING.**

#### **WARNING: INCREASED MORTALITY IN ELDERLY PATIENTS WITH DEMENTIA-RELATED PSYCHOSIS**

**Elderly patients with dementia-related psychosis treated with antipsychotic drugs are at an increased risk of death. INVEGA SUSTENNA® is not approved for use in patients with dementia-related psychosis. [see Warnings and Precautions].**

### INDICATIONS AND USAGE

INVEGA SUSTENNA® (paliperidone palmitate) is indicated for the treatment of:

- Schizophrenia in adults [see *Clinical Studies (14.1) in Full Prescribing Information*].
- Schizoaffective disorder in adults as monotherapy and as an adjunct to mood stabilizers or antidepressants [see *Clinical Studies (14.2) in Full Prescribing Information*].

### CONTRAINDICATIONS

INVEGA SUSTENNA® is contraindicated in patients with a known hypersensitivity to either paliperidone or risperidone, or to any of the excipients in the INVEGA SUSTENNA® formulation. Hypersensitivity reactions, including anaphylactic reactions and angioedema, have been reported in patients treated with risperidone and in patients treated with paliperidone. Paliperidone palmitate is converted to paliperidone, which is a metabolite of risperidone.

### WARNINGS AND PRECAUTIONS

#### **Increased Mortality in Elderly Patients with Dementia-Related Psychosis**

Elderly patients with dementia-related psychosis treated with antipsychotic drugs are at an increased risk of death. Analyses of 17 placebo-controlled trials (modal duration of 10 weeks), largely in patients taking atypical antipsychotic drugs, revealed a risk of death in drug-treated patients of between 1.6 to 1.7 times the risk of death in placebo-treated patients. Over the course of a typical 10-week controlled trial, the rate of death in drug-treated patients was about 4.5%, compared to a rate of about 2.6% in the placebo group.

Although the causes of death were varied, most of the deaths appeared to be either cardiovascular (e.g., heart failure, sudden death) or infectious (e.g., pneumonia) in nature. Observational studies suggest that, similar to atypical antipsychotic drugs, treatment with conventional antipsychotic drugs may increase mortality. The extent to which the findings of increased mortality in observational studies may be attributed to the antipsychotic drug as opposed to some characteristic(s) of the patients is not clear. INVEGA SUSTENNA® is not approved for the treatment of patients with dementia-related psychosis [see *Boxed Warning and Warnings and Precautions*].

#### **Cerebrovascular Adverse Reactions, Including Stroke, in Elderly Patients with Dementia-Related Psychosis**

In placebo-controlled trials with risperidone, aripiprazole, and olanzapine in elderly subjects with dementia, there was a higher incidence of cerebrovascular adverse reactions (cerebrovascular accidents and transient ischemic attacks) including fatalities compared to placebo-treated subjects. No studies have been conducted with oral paliperidone, INVEGA SUSTENNA®, or the 3-month paliperidone palmitate extended-release injectable suspension in elderly patients with dementia. These medicines are not approved for the treatment of patients with dementia-related psychosis [see *Boxed Warning and Warnings and Precautions*].

#### **Neuroleptic Malignant Syndrome**

Neuroleptic Malignant Syndrome (NMS), a potentially fatal symptom complex, has been reported in association with antipsychotic drugs, including paliperidone.

Clinical manifestations of NMS are hyperpyrexia, muscle rigidity, altered mental status including delirium, and autonomic instability (irregular pulse or blood pressure, tachycardia, diaphoresis, and cardiac dysrhythmia). Additional signs may include elevated creatine phosphokinase, myoglobinuria (rhabdomyolysis), and acute renal failure.

If NMS is suspected, immediately discontinue INVEGA SUSTENNA® and provide symptomatic treatment and monitoring.

#### **QT Prolongation**

Paliperidone causes a modest increase in the corrected QT (QTc) interval. The use of paliperidone should be avoided in combination with other drugs that are known to prolong QTc including Class 1A (e.g., quinidine, procainamide) or Class III (e.g., amiodarone, sotalol) antiarrhythmic medications, antipsychotic medications (e.g., chlorpromazine, thioridazine), antibiotics (e.g., gatifloxacin, moxifloxacin), or any other class of medications known to prolong the QTc interval. Paliperidone should also be avoided in patients with congenital long QT syndrome and in patients with a history of cardiac arrhythmias.

Certain circumstances may increase the risk of the occurrence of Torsades de pointes and/or sudden death in association with the use of drugs that prolong the QTc interval, including (1) bradycardia; (2) hypokalemia or hypomagnesemia; (3) concomitant use of other drugs that prolong the QTc interval; and (4) presence of congenital prolongation of the QT interval.

The effects of oral paliperidone on the QT interval were evaluated in a double-blind, active-controlled (moxifloxacin 400 mg single dose), multicenter QT study in adults with schizophrenia and schizoaffective disorder, and in three placebo- and active-controlled 6-week, fixed-dose efficacy trials in adults with schizophrenia.

## INVEGA SUSTENNA® (paliperidone palmitate)

extended-release injectable suspension, for intramuscular use

In the QT study (n=141), the 8 mg dose of immediate-release oral paliperidone (n=50) showed a mean placebo-subtracted increase from baseline in QTcLD of 12.3 msec (90% CI: 8.9; 15.6) on day 8 at 1.5 hours post-dose. The mean steady-state peak plasma concentration for this 8 mg dose of paliperidone immediate release ( $C_{max,ss} = 113$  ng/mL) was more than 2-fold the exposure observed with the maximum recommended 234 mg dose of INVEGA SUSTENNA® administered in the deltoid muscle (predicted median  $C_{max,ss} = 50$  ng/mL). In this same study, a 4 mg dose of the immediate-release oral formulation of paliperidone, for which  $C_{max,ss} = 35$  ng/mL, showed an increased placebo-subtracted QTcLD of 6.8 msec (90% CI: 3.6; 10.1) on day 2 at 1.5 hours post-dose.

In the three fixed-dose efficacy studies of oral paliperidone extended release in subjects with schizophrenia, electrocardiogram (ECG) measurements taken at various time points showed only one subject in the oral paliperidone 12 mg group had a change exceeding 60 msec at one time-point on Day 6 (increase of 62 msec).

In the four fixed-dose efficacy studies of INVEGA SUSTENNA® in subjects with schizophrenia and in the long-term study in subjects with schizoaffective disorder, no subject experienced a change in QTcLD exceeding 60 msec and no subject had a QTcLD value of > 500 msec at any time point. In the maintenance study in subjects with schizophrenia, no subject had a QTcLD change > 60 msec, and one subject had a QTcLD value of 507 msec (Bazett's QT corrected interval [QTcB] value of 483 msec); this latter subject also had a heart rate of 45 beats per minute.

#### **Tardive Dyskinesia**

Tardive dyskinesia, a syndrome consisting of potentially irreversible, involuntary, dyskinetic movements, may develop in patients treated with antipsychotic drugs. Although the prevalence of the syndrome appears to be highest among the elderly, especially elderly women, it is impossible to predict which patients will develop the syndrome. Whether antipsychotic drug products differ in their potential to cause tardive dyskinesia is unknown.

The risk of developing tardive dyskinesia and the likelihood that it will become irreversible appear to increase with the duration of treatment and the cumulative dose. The syndrome can develop after relatively brief treatment periods, even at low doses. It may also occur after discontinuation of treatment.

Tardive dyskinesia may remit, partially or completely, if antipsychotic treatment is discontinued. Antipsychotic treatment, itself, however, may suppress (or partially suppress) the signs and symptoms of the syndrome, possibly masking the underlying process. The effect that symptomatic suppression has upon the long-term course of the syndrome is unknown.

Given these considerations, INVEGA SUSTENNA® should be prescribed in a manner that is most likely to minimize the occurrence of tardive dyskinesia. Chronic antipsychotic treatment should generally be reserved for patients: (1) who suffer from a chronic illness that is known to respond to antipsychotic drugs, and (2) for whom alternative, equally effective, but potentially less harmful treatments are not available or appropriate. In patients who do require chronic treatment, use the lowest dose and the shortest duration of treatment producing a satisfactory clinical response. Periodically reassess the need for continued treatment.

If signs and symptoms of tardive dyskinesia appear in a patient on INVEGA SUSTENNA®, drug discontinuation should be considered. However, some patients may require treatment with INVEGA SUSTENNA® despite the presence of the syndrome.

#### **Metabolic Changes**

Atypical antipsychotic drugs have been associated with metabolic changes that may increase cardiovascular/cerebrovascular risk. These metabolic changes include hyperglycemia, dyslipidemia, and body weight gain. While all of the drugs in the class have been shown to produce some metabolic changes, each drug has its own specific risk profile.

#### **Hyperglycemia and Diabetes Mellitus**

Hyperglycemia and diabetes mellitus, in some cases extreme and associated with ketoacidosis or hyperosmolar coma or death, have been reported in patients treated with all atypical antipsychotics. These cases were, for the most part, seen in post-marketing clinical use and epidemiologic studies, not in clinical trials. Hyperglycemia and diabetes have been reported in trial subjects treated with INVEGA SUSTENNA®. Assessment of the relationship between atypical antipsychotic use and glucose abnormalities is complicated by the possibility of an increased background risk of diabetes mellitus in patients with schizophrenia and the increasing incidence of diabetes mellitus in the general population. Given these confounders, the relationship between atypical antipsychotic use and hyperglycemia-related adverse events is not completely understood. However, epidemiological studies suggest an increased risk of hyperglycemia-related adverse reactions in patients treated with the atypical antipsychotics.

Patients with an established diagnosis of diabetes mellitus who are started on atypical antipsychotics should be monitored regularly for worsening of glucose control. Patients with risk factors for diabetes mellitus (e.g., obesity, family history of diabetes) who are starting treatment with atypical antipsychotics should undergo fasting blood glucose testing at the beginning of treatment and periodically during treatment. Any patient treated with atypical antipsychotics should be monitored for symptoms of hyperglycemia including polydipsia, polyuria, polyphagia, and weakness. Patients who develop symptoms of hyperglycemia during treatment with atypical antipsychotics should undergo fasting blood glucose testing. In some cases, hyperglycemia has resolved when the atypical antipsychotic was discontinued; however, some patients required continuation of anti-diabetic treatment despite discontinuation of the suspect drug.

Pooled data from the four placebo-controlled (one 9-week and three 13-week), fixed-dose studies in subjects with schizophrenia are presented in Table 1.

**INVEGA SUSTENNA®** (paliperidone palmitate)  
extended-release injectable suspension, for intramuscular use

**Table 1: Change in Fasting Glucose from Four Placebo-Controlled, 9- to 13-Week, Fixed-Dose Studies in Subjects with Schizophrenia**

|                                                         | INVEGA SUSTENNA®                   |             |               |              |                        |                         |                         |
|---------------------------------------------------------|------------------------------------|-------------|---------------|--------------|------------------------|-------------------------|-------------------------|
|                                                         | Placebo                            | 39 mg       | 78 mg         | 156 mg       | 234/39 mg <sup>a</sup> | 234/156 mg <sup>a</sup> | 234/234 mg <sup>a</sup> |
|                                                         | n=367                              | n=86        | n=244         | n=238        | n=110                  | n=126                   | n=115                   |
|                                                         | Mean change from baseline (mg/dL)  |             |               |              |                        |                         |                         |
| Serum Glucose Change from baseline                      | -1.3                               | 1.3         | 3.5           | 0.1          | 3.4                    | 1.8                     | -0.2                    |
|                                                         | Proportion of Patients with Shifts |             |               |              |                        |                         |                         |
| Serum Glucose Normal to High (<100 mg/dL to ≥126 mg/dL) | 4.6% (11/241)                      | 6.3% (4/64) | 6.4% (11/173) | 3.9% (6/154) | 2.5% (2/79)            | 7.0% (6/86)             | 6.6% (5/76)             |

<sup>a</sup> Initial deltoid injection of 234 mg followed by either 39 mg, 156 mg, or 234 mg every 4 weeks by deltoid or gluteal injection. Other dose groups (39 mg, 78 mg, and 156 mg) are from studies involving only gluteal injection. [see Clinical Studies (14.1) in Full Prescribing Information].

In a long-term open-label pharmacokinetic and safety study in subjects with schizophrenia in which the highest dose available (234 mg) was evaluated, INVEGA SUSTENNA® was associated with a mean change in glucose of -0.4 mg/dL at Week 29 (n=109) and +6.8 mg/dL at Week 53 (n=100).

During the initial 25-week open-label period of a long-term study in subjects with schizoaffective disorder, INVEGA SUSTENNA® was associated with mean change in glucose of +5.3 mg/dL (n=518). At the endpoint of the subsequent 15-month double-blind period of the study, INVEGA SUSTENNA® was associated with a mean change in glucose of +0.3 mg/dL (n=131) compared with a mean change of +4.0 mg/dL in the placebo group (n=120).

#### Dyslipidemia

Undesirable alterations in lipids have been observed in patients treated with atypical antipsychotics.

Pooled data from the four placebo-controlled (one 9-week and three 13-week), fixed-dose studies in subjects with schizophrenia are presented in Table 2.

**Table 2: Change in Fasting Lipids from Four Placebo-Controlled, 9- to 13-Week, Fixed-Dose Studies in Subjects with Schizophrenia**

|                                                         | INVEGA SUSTENNA®                   |              |               |                |                        |                         |                         |
|---------------------------------------------------------|------------------------------------|--------------|---------------|----------------|------------------------|-------------------------|-------------------------|
|                                                         | Placebo                            | 39 mg        | 78 mg         | 156 mg         | 234/39 mg <sup>a</sup> | 234/156 mg <sup>a</sup> | 234/234 mg <sup>a</sup> |
|                                                         | n=366                              | n=89         | n=244         | n=232          | n=105                  | n=119                   | n=120                   |
|                                                         | Mean change from baseline (mg/dL)  |              |               |                |                        |                         |                         |
| Cholesterol Change from baseline                        | -6.6                               | -6.4         | -5.8          | -7.1           | -0.9                   | -4.2                    | 9.4                     |
| LDL Change from baseline                                | -6.0                               | -4.8         | -5.6          | -4.8           | 0.9                    | -2.4                    | 5.2                     |
| HDL Change from baseline                                | 0.7                                | 2.1          | 0.6           | 0.3            | 1.5                    | 1.1                     | 0.0                     |
| Triglycerides Change from baseline                      | -16.7                              | 7.6          | -9.0          | -11.5          | -14.1                  | -20.0                   | 11.9                    |
|                                                         | Proportion of Patients with Shifts |              |               |                |                        |                         |                         |
| Cholesterol Normal to High (<200 mg/dL to ≥240 mg/dL)   | 3.2% (7/222)                       | 2.0% (1/51)  | 2.0% (3/147)  | 2.1% (3/141)   | 0% (0/69)              | 3.1% (2/65)             | 7.1% (6/84)             |
| LDL Normal to High (<100 mg/dL to ≥160 mg/dL)           | 1.1% (1/95)                        | 0% (0/29)    | 0% (0/67)     | 0% (0/46)      | 0% (0/41)              | 0% (0/37)               | 0% (0/44)               |
| HDL Normal to Low (≥40 mg/dL to <40 mg/dL)              | 13.8% (28/203)                     | 14.8% (9/61) | 9.6% (11/115) | 14.2% (15/106) | 12.7% (9/71)           | 10.5% (8/76)            | 16.0% (13/81)           |
| Triglycerides Normal to High (<150 mg/dL to ≥200 mg/dL) | 3.6% (8/221)                       | 6.1% (3/49)  | 9.2% (14/153) | 7.2% (10/139)  | 1.3% (1/79)            | 3.7% (3/82)             | 10.7% (9/84)            |

<sup>a</sup> Initial deltoid injection of 234 mg followed by either 39 mg, 156 mg, or 234 mg every 4 weeks by deltoid or gluteal injection. Other dose groups (39 mg, 78 mg, and 156 mg) are from studies involving only gluteal injection. [see Clinical Studies (14.1) in Full Prescribing Information].

In a long-term open-label pharmacokinetic and safety study in subjects with schizophrenia in which the highest dose available (234 mg) was evaluated, the mean changes from baseline in lipid values are presented in Table 3.

**INVEGA SUSTENNA®** (paliperidone palmitate)  
extended-release injectable suspension, for intramuscular use

**Table 3: Change in Fasting Lipids from Long-term Open-label Pharmacokinetic and Safety Study in Subjects with Schizophrenia**

|                                    | INVEGA SUSTENNA® 234 mg           |         |
|------------------------------------|-----------------------------------|---------|
|                                    | Week 29                           | Week 53 |
|                                    | n=112                             | n=100   |
|                                    | Mean change from baseline (mg/dL) |         |
| Cholesterol Change from baseline   | -1.2                              | 0.1     |
| LDL Change from baseline           | -2.7                              | -2.3    |
| HDL Change from baseline           | -0.8                              | -2.6    |
| Triglycerides Change from baseline | 16.2                              | 37.4    |

The mean changes from baseline in lipid values during the initial 25-week open-label period and at the endpoint of the subsequent 15-month double-blind period in a long-term study in subjects with schizoaffective disorder are presented in Table 4.

**Table 4: Change in Fasting Lipids from an Open-Label and Double-Blind Periods of a Long-Term Study in Subjects with Schizoaffective Disorder**

|                                    | Open-Label Period                 | Double-Blind Period |                  |
|------------------------------------|-----------------------------------|---------------------|------------------|
|                                    | INVEGA SUSTENNA®                  | Placebo             | INVEGA SUSTENNA® |
|                                    | n=198                             | n=119               | n=132            |
|                                    | Mean change from baseline (mg/dL) |                     |                  |
| Cholesterol Change from baseline   | -3.9                              | -4.2                | 2.3              |
| LDL Change from baseline           | -2.7                              | -2.8                | 5.9              |
| HDL Change from baseline           | -2.7                              | -0.9                | -0.7             |
| Triglycerides Change from baseline | 7.0                               | 2.5                 | -12.3            |

#### Weight Gain

Weight gain has been observed with atypical antipsychotic use. Clinical monitoring of weight is recommended.

Data on mean changes in body weight and the proportion of subjects meeting a weight gain criterion of ≥ 7% of body weight from the four placebo-controlled (one 9-week and three 13-week), fixed-dose studies in subjects with schizophrenia are presented in Table 5.

**Table 5: Mean Change in Body Weight (kg) and the Proportion of Subjects with ≥ 7% Gain in Body Weight from Four Placebo-Controlled, 9- to 13-Week, Fixed-Dose Studies in Subjects with Schizophrenia**

|                                         | INVEGA SUSTENNA® |       |       |        |                        |                         |                         |
|-----------------------------------------|------------------|-------|-------|--------|------------------------|-------------------------|-------------------------|
|                                         | Placebo          | 39 mg | 78 mg | 156 mg | 234/39 mg <sup>a</sup> | 234/156 mg <sup>a</sup> | 234/234 mg <sup>a</sup> |
|                                         | n=451            | n=116 | n=280 | n=267  | n=137                  | n=144                   | n=145                   |
| Weight (kg) Change from baseline        | -0.4             | 0.4   | 0.8   | 1.4    | 0.4                    | 0.7                     | 1.4                     |
| Weight Gain ≥ 7% increase from baseline | 3.3%             | 6.0%  | 8.9%  | 9.0%   | 5.8%                   | 8.3%                    | 13.1%                   |

<sup>a</sup> Initial deltoid injection of 234 mg followed by either 39 mg, 156 mg, or 234 mg every 4 weeks by deltoid or gluteal injection. Other dose groups (39 mg, 78 mg, and 156 mg) are from studies involving only gluteal injection. [see Clinical Studies (14.1) in Full Prescribing Information].

In a long-term open-label pharmacokinetic and safety study in which the highest dose available (234 mg) was evaluated, INVEGA SUSTENNA® was associated with a mean change in weight of +2.4 kg at Week 29 (n=134) and +4.3 kg at Week 53 (n=113).

During the initial 25-week open-label period of a long-term study in subjects with schizoaffective disorder, INVEGA SUSTENNA® was associated with a mean change in weight of +2.2 kg and 18.4% of subjects had an increase in body weight of ≥ 7% (n=653). At the endpoint of the subsequent 15-month double-blind period of the study, INVEGA SUSTENNA® was associated with a mean change in weight of -0.2 kg and 13.0% of subjects had an increase in body weight of ≥ 7% (n=161); the placebo group had a mean change in weight of -0.8 kg and 6.0% of subjects had an increase in body weight of ≥ 7% (n=168).

**INVEGA SUSTENNA®** (paliperidone palmitate)  
extended-release injectable suspension, for intramuscular use

### Orthostatic Hypotension and Syncope

Paliperidone can induce orthostatic hypotension and syncope in some patients because of its alpha-adrenergic blocking activity. Syncope was reported in < 1% (4/1293) of subjects treated with INVEGA SUSTENNA® in the recommended dose range of 39 mg to 234 mg in the four fixed-dose, double-blind, placebo-controlled trials compared with 0% (0/510) of subjects treated with placebo. In the four fixed-dose efficacy studies in subjects with schizophrenia, orthostatic hypotension was reported as an adverse event by < 1% (2/1293) of INVEGA SUSTENNA®-treated subjects compared to 0% (0/510) with placebo. Incidences of orthostatic hypotension and syncope in the long-term studies in subjects with schizophrenia and schizoaffective disorder were similar to those observed in the short-term studies.

INVEGA SUSTENNA® should be used with caution in patients with known cardiovascular disease (e.g., heart failure, history of myocardial infarction or ischemia, conduction abnormalities), cerebrovascular disease, or conditions that predispose the patient to hypotension (e.g., dehydration, hypovolemia, and treatment with antihypertensive medications). Monitoring of orthostatic vital signs should be considered in patients who are vulnerable to hypotension.

### Falls

Somnolence, postural hypotension, motor and sensory instability have been reported with the use of antipsychotics, including INVEGA SUSTENNA®, which may lead to falls and, consequently, fractures or other fall-related injuries. For patients, particularly the elderly, with diseases, conditions, or medications that could exacerbate these effects, assess the risk of falls when initiating antipsychotic treatment and recurrently for patients on long-term antipsychotic therapy.

### Leukopenia, Neutropenia, and Agranulocytosis

In clinical trial and/or postmarketing experience, events of leukopenia and neutropenia have been reported temporally related to antipsychotic agents, including INVEGA SUSTENNA®. Agranulocytosis has also been reported.

Possible risk factors for leukopenia/neutropenia include pre-existing low white blood cell count (WBC)/absolute neutrophil count (ANC) and history of drug-induced leukopenia/neutropenia. In patients with a history of a clinically significant low WBC/ANC or a drug-induced leukopenia/neutropenia, perform a complete blood count (CBC) frequently during the first few months of therapy. In such patients, consider discontinuation of INVEGA SUSTENNA® at the first sign of a clinically significant decline in WBC in the absence of other causative factors.

Monitor patients with clinically significant neutropenia for fever or other symptoms or signs of infection and treat promptly if such symptoms or signs occur. Discontinue INVEGA SUSTENNA® in patients with severe neutropenia (absolute neutrophil count < 1000/mm<sup>3</sup>) and follow their WBC until recovery.

### Hyperprolactinemia

Like other drugs that antagonize dopamine D<sub>2</sub> receptors, paliperidone elevates prolactin levels and the elevation persists during chronic administration. Paliperidone has a prolactin-elevating effect similar to that seen with risperidone, a drug that is associated with higher levels of prolactin than other antipsychotic drugs.

Hyperprolactinemia, regardless of etiology, may suppress hypothalamic GnRH, resulting in reduced pituitary gonadotrophin secretion. This, in turn, may inhibit reproductive function by impairing gonadal steroidogenesis in both female and male patients. Galactorrhea, amenorrhea, gynecomastia, and impotence have been reported in patients receiving prolactin-elevating compounds. Long-standing hyperprolactinemia when associated with hypogonadism may lead to decreased bone density in both female and male subjects.

Tissue culture experiments indicate that approximately one-third of human breast cancers are prolactin dependent *in vitro*, a factor of potential importance if the prescription of these drugs is considered in a patient with previously detected breast cancer. An increase in the incidence of pituitary gland, mammary gland, and pancreatic islet cell neoplasia (mammary adenocarcinomas, pituitary and pancreatic adenomas) was observed in the risperidone carcinogenicity studies conducted in mice and rats [see *Nonclinical Toxicology (13.1) in Full Prescribing Information*]. Neither clinical studies nor epidemiologic studies conducted to date have shown an association between chronic administration of this class of drugs and tumorigenesis in humans, but the available evidence is too limited to be conclusive.

Prolactin data from two long-term, double-blind, placebo-controlled studies with INVEGA SUSTENNA® are presented below; one study was in a population of patients with schizophrenia; the second study was in patients with schizoaffective disorder.

### Schizophrenia

In a long-term maintenance trial of INVEGA SUSTENNA® in schizophrenia patients (Study PSY-3001), see *Clinical Studies (14.1)*, elevations of prolactin to above the reference range (> 18 ng/mL in males and > 30 ng/mL in females) relative to open-label baseline at any time during the double-blind phase were noted in a higher percentage of the patients in the INVEGA SUSTENNA® group than those in the placebo group in males (51.9% vs. 29.0%) and in females (50.5% vs. 42.9%). During the double-blind phase, 4 females (4.2%) in the INVEGA SUSTENNA® group experienced potentially prolactin-related adverse reactions (amenorrhea N=2; galactorrhea N=1; menstruation irregular N=1), while 2 females (2.2%) in

**INVEGA SUSTENNA®** (paliperidone palmitate)  
extended-release injectable suspension, for intramuscular use

the placebo group experienced potentially prolactin-related adverse reactions (amenorrhea N=1; breast pain N=1). One male (0.9%) in the INVEGA SUSTENNA® group experienced erectile dysfunction and 1 male (0.9%) in placebo group experienced gynecomastia.

Prior to the double-blind phase (during the 33-week open-label phase of the long-term maintenance trial), the mean (SD) serum prolactin values at baseline were 14.9 (22.3) ng/mL in males (N=490) and 35.2 (39.6) ng/mL in females (N=358). At the end of the open-label phase, mean (SD) prolactin values were 24.7 (22.5) ng/mL in males (N=470) and 59.5 (38.1) ng/mL in females (N=333). During the open-label phases 49.2% of females and 47.7% of males experienced elevations of prolactin above the reference range relative to baseline, and a higher proportion of females experienced potentially prolactin-related adverse reactions compared to males (5.3% vs. 1.8%). Amenorrhea (2.5%) in females and no single potentially prolactin-related adverse reaction in males were observed with a rate greater than 2%.

### Schizoaffective Disorder

In a long-term maintenance trial of INVEGA SUSTENNA® in patients with schizoaffective disorder (Study SCA-3004) see *Clinical Studies (14.2)*, elevations of prolactin to above the reference range (> 13.13 ng/mL in males and > 26.72 ng/mL in females) relative to open-label baseline at any time during the 15-month double-blind phase were noted in a higher percentage of patients in the INVEGA SUSTENNA® group than those in the placebo group in males (55.6% vs. 23.2%) and in females (44.3% vs. 25.0%). During the 15-month double-blind phase, 11 females (13.9%) in the INVEGA SUSTENNA® group had 14 potentially prolactin-related adverse reactions (hyperprolactinemia N=3; blood prolactin increased N=4; libido decreased N=1; amenorrhea N=3; galactorrhea N=3), while 5 females (5.8%) in the placebo group had 6 potentially prolactin-related adverse reactions (hyperprolactinemia N=2; blood prolactin increased N=1; amenorrhea N=2; galactorrhea N=1). Six males (7.1%) in the INVEGA SUSTENNA® group experienced 6 potentially prolactin-related adverse reactions (hyperprolactinemia N=4; libido decreased N=1; erectile dysfunction N=1), while 1 male (1.2%) in the placebo group experienced adverse reaction of blood prolactin increased.

Prior to the 15-month double-blind phase (during the 25-week open-label phase of the long-term maintenance trial), the mean (SD) serum prolactin values at baseline were 14.6 (14.0) ng/mL in males (N=352) and 39.1 (44.6) ng/mL in females (N=302). At the end of the open-label phase, mean (SD) prolactin values were 32.8 (17.2) ng/mL in males (N=275) and 72.4 (46.5) ng/mL in females (N=239). During the open-label phase, 48.9% of females and 53.3% of males experienced elevations of prolactin above the reference range relative to baseline, and a higher proportion of females experienced potentially prolactin-related adverse reactions compared to males (10.0% vs. 9.0%). Amenorrhea (5.8%) and galactorrhea (2.9%) in females and libido decrease (2.8%) and erectile dysfunction (2.5%) in males were observed with a rate greater than 2%.

### Potential for Cognitive and Motor Impairment

Somnolence, sedation, and dizziness were reported as adverse reactions in subjects treated with INVEGA SUSTENNA® [see *Adverse Reactions*]. Antipsychotics, including INVEGA SUSTENNA®, have the potential to impair judgment, thinking, or motor skills. Patients should be cautioned about performing activities requiring mental alertness, such as operating hazardous machinery or operating a motor vehicle, until they are reasonably certain that paliperidone therapy does not adversely affect them.

### Seizures

In the four fixed-dose double-blind placebo-controlled studies in subjects with schizophrenia, <1% (1/1293) of subjects treated with INVEGA SUSTENNA® in the recommended dose range of 39 mg to 234 mg experienced an adverse event of convulsion compared with <1% (1/510) of placebo-treated subjects who experienced an adverse event of grand mal convulsion.

Like other antipsychotic drugs, INVEGA SUSTENNA® should be used cautiously in patients with a history of seizures or other conditions that potentially lower the seizure threshold. Conditions that lower the seizure threshold may be more prevalent in patients 65 years or older.

### Dysphagia

Esophageal dysmotility and aspiration have been associated with antipsychotic drug use. INVEGA SUSTENNA® and other antipsychotic drugs should be used cautiously in patients at risk for aspiration pneumonia.

### Priapism

Drugs with alpha-adrenergic blocking effects have been reported to induce priapism. Although no cases of priapism have been reported in clinical trials with INVEGA SUSTENNA®, priapism has been reported with oral paliperidone during postmarketing surveillance. Severe priapism may require surgical intervention.

### Disruption of Body Temperature Regulation

Disruption of the body's ability to reduce core body temperature has been attributed to antipsychotic agents. Appropriate care is advised when prescribing INVEGA SUSTENNA® to patients who will be experiencing conditions which may contribute to an elevation in core body temperature, e.g., exercising strenuously, exposure to extreme heat, receiving concomitant medication with anticholinergic activity, or being subject to dehydration.

**INVEGA SUSTENNA®** (paliperidone palmitate)  
extended-release injectable suspension, for intramuscular use

#### ADVERSE REACTIONS

The following are discussed in more detail in other sections of the labeling:

- Increased mortality in elderly patients with dementia-related psychosis [see *Boxed Warning and Warnings and Precautions*]
- Cerebrovascular adverse reactions, including stroke, in elderly patients with dementia-related psychosis [see *Warnings and Precautions*]
- Neuroleptic malignant syndrome [see *Warnings and Precautions*]
- QT prolongation [see *Warnings and Precautions*]
- Tardive dyskinesia [see *Warnings and Precautions*]
- Metabolic changes [see *Warnings and Precautions*]
- Orthostatic hypotension and syncope [see *Warnings and Precautions*]
- Falls [see *Warnings and Precautions*]
- Leukopenia, neutropenia, and agranulocytosis [see *Warnings and Precautions*]
- Hyperprolactinemia [see *Warnings and Precautions*]
- Potential for cognitive and motor impairment [see *Warnings and Precautions*]
- Seizures [see *Warnings and Precautions*]
- Dysphagia [see *Warnings and Precautions*]
- Priapism [see *Warnings and Precautions*]
- Disruption of body temperature regulation [see *Warnings and Precautions*]

#### Clinical Trials Experience

Because clinical trials are conducted under widely varying conditions, adverse reaction rates observed in the clinical trials of a drug cannot be directly compared to rates in the clinical trials of another drug and may not reflect the rates observed in clinical practice.

##### Patient Exposure

The data described in this section are derived from a clinical trial database consisting of a total of 3817 subjects (approximately 1705 patient-years exposure) with schizophrenia who received at least one dose of INVEGA SUSTENNA® in the recommended dose range of 39 mg to 234 mg and a total of 510 subjects with schizophrenia who received placebo. Among the 3817 INVEGA SUSTENNA®-treated subjects, 1293 received INVEGA SUSTENNA® in four fixed-dose, double-blind, placebo-controlled trials (one 9-week and three 13-week studies), 849 received INVEGA SUSTENNA® in the maintenance trial (median exposure 229 days during the initial 33-week open-label phase of this study, of whom 205 continued to receive INVEGA SUSTENNA® during the double-blind placebo-controlled phase of this study [median exposure 171 days]), and 1675 received INVEGA SUSTENNA® in five non-placebo controlled trials (three noninferiority active-comparator trials, one long-term open-label pharmacokinetic and safety study, and an injection site [deltoid-gluteal] cross-over trial). One of the 13-week studies included a 234 mg INVEGA SUSTENNA® initiation dose followed by treatment with either 39 mg, 156 mg, or 234 mg every 4 weeks.

The safety of INVEGA SUSTENNA® was also evaluated in a 15-month, long-term study comparing INVEGA SUSTENNA® to selected oral antipsychotic therapies in adult subjects with schizophrenia. A total of 226 subjects received INVEGA SUSTENNA® during the 15-month, open-label period of this study; 218 subjects received selected oral antipsychotic therapies. The safety of INVEGA SUSTENNA® was similar to that seen in previous double-blind, placebo-controlled clinical trials in adult subjects with schizophrenia. The safety of INVEGA SUSTENNA® was also evaluated in a long-term study in adult subjects with schizoaffective disorder. A total of 667 subjects received INVEGA SUSTENNA® during the initial 25-week open-label period of this study (median exposure 147 days); 164 subjects continued to receive INVEGA SUSTENNA® during the 15-month double-blind placebo-controlled period of this study (median exposure 446 days). Adverse reactions that occurred more frequently in the INVEGA SUSTENNA® than the placebo group (a 2% difference or more between groups) were weight increased, nasopharyngitis, headache, hyperprolactinemia, and pyrexia.

##### Adverse Reactions in Double-Blind, Placebo-Controlled Clinical Trials

**Commonly Observed Adverse Reactions:** The most common (at least 5% in any INVEGA SUSTENNA® group) and likely drug-related (adverse events for which the drug rate is at least twice the placebo rate) adverse reactions from the double-blind, placebo-controlled trials in subjects with schizophrenia were injection site reactions, somnolence/sedation, dizziness, akathisia, and extrapyramidal disorder. No occurrences of adverse events reached this threshold in the long-term double-blind, placebo-controlled study in subjects with schizoaffective disorder.

**Discontinuation of Treatment Due to Adverse Events:** The percentage of subjects who discontinued due to adverse events in the four fixed-dose, double-blind, placebo-controlled schizophrenia trials were similar for INVEGA SUSTENNA®- and placebo-treated subjects.

The percentage of subjects who discontinued due to adverse events in the open-label period of the long-term study in subjects with schizoaffective disorder was 7.5%. During the double-blind, placebo-controlled period of that study, the percentages of subjects who discontinued due to adverse events were 5.5% and 1.8% in INVEGA SUSTENNA®- and placebo-treated subjects, respectively.

**Dose-Related Adverse Reactions:** Based on the pooled data from the four fixed-dose, double-blind, placebo-controlled trials in subjects with schizophrenia, among the adverse reactions that occurred with ≥ 2% incidence in the subjects treated with INVEGA SUSTENNA®, only akathisia increased with dose. Hyperprolactinemia also exhibited a dose relationship, but did not occur at ≥ 2% incidence in INVEGA SUSTENNA®-treated subjects from the four fixed-dose studies.

**INVEGA SUSTENNA®** (paliperidone palmitate)  
extended-release injectable suspension, for intramuscular use

**Adverse Reactions Occurring at an Incidence of 2% or More in INVEGA SUSTENNA®-Treated Patients:** Table 6 lists the adverse reactions reported in 2% or more of INVEGA SUSTENNA®-treated subjects and at a greater proportion than in the placebo group with schizophrenia in the four fixed-dose, double-blind, placebo-controlled trials.

**Table 6: Incidences of Adverse Reactions 2% or More of INVEGA SUSTENNA®-Treated Patients (and Greater than Placebo) with Schizophrenia in Four Fixed-Dose, Double-Blind, Placebo-Controlled Trials**

| System Organ Class                                          | Placebo <sup>a</sup><br>(N=510) | INVEGA SUSTENNA® |                  |                   |                                   |                                    |                                    |
|-------------------------------------------------------------|---------------------------------|------------------|------------------|-------------------|-----------------------------------|------------------------------------|------------------------------------|
|                                                             |                                 | 39 mg<br>(N=130) | 78 mg<br>(N=302) | 156 mg<br>(N=312) | 234/39 mg <sup>b</sup><br>(N=160) | 234/156 mg <sup>b</sup><br>(N=165) | 234/234 mg <sup>b</sup><br>(N=163) |
| <b>Adverse Reactions</b>                                    |                                 |                  |                  |                   |                                   |                                    |                                    |
| Total percentage of subjects with adverse reactions         | 70                              | 75               | 68               | 69                | 63                                | 60                                 | 63                                 |
| <b>Gastrointestinal disorders</b>                           |                                 |                  |                  |                   |                                   |                                    |                                    |
| Abdominal discomfort/abdominal pain upper                   | 2                               | 2                | 4                | 4                 | 1                                 | 2                                  | 4                                  |
| Diarrhea                                                    | 2                               | 0                | 3                | 2                 | 1                                 | 2                                  | 2                                  |
| Dry mouth                                                   | 1                               | 3                | 1                | 0                 | 1                                 | 1                                  | 1                                  |
| Nausea                                                      | 3                               | 4                | 4                | 3                 | 2                                 | 2                                  | 2                                  |
| Toothache                                                   | 1                               | 1                | 1                | 3                 | 1                                 | 2                                  | 3                                  |
| Vomiting                                                    | 4                               | 5                | 4                | 2                 | 3                                 | 2                                  | 2                                  |
| <b>General disorders and administration site conditions</b> |                                 |                  |                  |                   |                                   |                                    |                                    |
| Asthenia                                                    | 0                               | 2                | 1                | <1                | 0                                 | 1                                  | 1                                  |
| Fatigue                                                     | 1                               | 1                | 2                | 2                 | 1                                 | 2                                  | 1                                  |
| Injection site reactions                                    | 2                               | 0                | 4                | 6                 | 9                                 | 7                                  | 10                                 |
| <b>Infections and infestations</b>                          |                                 |                  |                  |                   |                                   |                                    |                                    |
| Nasopharyngitis                                             | 2                               | 0                | 2                | 2                 | 4                                 | 2                                  | 2                                  |
| Upper respiratory tract infection                           | 2                               | 2                | 2                | 2                 | 1                                 | 2                                  | 4                                  |
| Urinary tract infection                                     | 1                               | 0                | 1                | <1                | 1                                 | 1                                  | 2                                  |
| <b>Investigations</b>                                       |                                 |                  |                  |                   |                                   |                                    |                                    |
| Weight increased                                            | 1                               | 4                | 4                | 1                 | 1                                 | 1                                  | 2                                  |
| <b>Musculoskeletal and connective tissue disorders</b>      |                                 |                  |                  |                   |                                   |                                    |                                    |
| Back pain                                                   | 2                               | 2                | 1                | 3                 | 1                                 | 1                                  | 1                                  |
| Musculoskeletal stiffness                                   | 1                               | 1                | <1               | <1                | 1                                 | 1                                  | 2                                  |
| Myalgia                                                     | 1                               | 2                | 1                | <1                | 1                                 | 0                                  | 2                                  |
| Pain in extremity                                           | 1                               | 0                | 2                | 2                 | 2                                 | 3                                  | 0                                  |
| <b>Nervous system disorders</b>                             |                                 |                  |                  |                   |                                   |                                    |                                    |
| Akathisia                                                   | 3                               | 2                | 2                | 3                 | 1                                 | 5                                  | 6                                  |
| Dizziness                                                   | 1                               | 6                | 2                | 4                 | 1                                 | 4                                  | 2                                  |
| Extrapyramidal disorder                                     | 1                               | 5                | 2                | 3                 | 1                                 | 0                                  | 0                                  |
| Headache                                                    | 12                              | 11               | 11               | 15                | 11                                | 7                                  | 6                                  |
| Somnolence/sedation                                         | 3                               | 5                | 7                | 4                 | 1                                 | 5                                  | 5                                  |
| <b>Psychiatric disorders</b>                                |                                 |                  |                  |                   |                                   |                                    |                                    |
| Agitation                                                   | 7                               | 10               | 5                | 9                 | 8                                 | 5                                  | 4                                  |
| Anxiety                                                     | 7                               | 8                | 5                | 3                 | 5                                 | 6                                  | 6                                  |
| Nightmare                                                   | <1                              | 2                | 0                | 0                 | 0                                 | 0                                  | 0                                  |
| <b>Respiratory, thoracic and mediastinal disorders</b>      |                                 |                  |                  |                   |                                   |                                    |                                    |
| Cough                                                       | 1                               | 2                | 3                | 1                 | 0                                 | 1                                  | 1                                  |
| <b>Vascular disorders</b>                                   |                                 |                  |                  |                   |                                   |                                    |                                    |
| Hypertension                                                | 1                               | 2                | 1                | 1                 | 1                                 | 1                                  | 0                                  |

Percentages are rounded to whole numbers. Table includes adverse reactions that were reported in 2% or more of subjects in any of the INVEGA SUSTENNA® dose groups and which occurred at greater incidence than in the placebo group.

<sup>a</sup> Placebo group is pooled from all studies and included either deltoid or gluteal injection depending on study design.

<sup>b</sup> Initial deltoid injection of 234 mg followed by either 39 mg, 156 mg, or 234 mg every 4 weeks by deltoid or gluteal injection. Other dose groups (39 mg, 78 mg, and 156 mg) are from studies involving only gluteal injection. [see *Clinical Studies (14.1) in Full Prescribing Information*]

Adverse reactions for which the INVEGA SUSTENNA® incidence was equal to or less than placebo are not listed in the table, but included the following: dyspepsia, psychotic disorder, schizophrenia, and tremor. The following terms were combined: somnolence/sedation, breast tenderness/breast pain, abdominal discomfort/abdominal pain upper/stomach discomfort, and tachycardia/sinus tachycardia/heart rate increased. All injection site reaction-related adverse reactions were collapsed and are grouped under "Injection site reactions".

**INVEGA SUSTENNA®** (paliperidone palmitate)  
extended-release injectable suspension, for intramuscular use

Other Adverse Reactions Observed During the Clinical Trial Evaluation of INVEGA SUSTENNA®  
The following list does not include reactions: 1) already listed in previous tables or elsewhere in labeling, 2) for which a drug cause was remote, 3) which were so general as to be uninformative, or 4) which were not considered to have significant clinical implications.

**Cardiac disorders:** atrioventricular block first degree, bradycardia, bundle branch block, palpitations, postural orthostatic tachycardia syndrome, tachycardia

**Ear and labyrinth disorders:** vertigo

**Eye disorders:** eye movement disorder, eye rolling, oculogyric crisis, vision blurred

**Gastrointestinal disorders:** constipation, dyspepsia, flatulence, salivary hypersecretion

**Immune system disorders:** hypersensitivity

**Investigations:** alanine aminotransferase increased, aspartate aminotransferase increased, electrocardiogram abnormal

**Metabolism and nutrition disorders:** decreased appetite, hyperinsulinemia, increased appetite

**Musculoskeletal and connective tissue disorders:** arthralgia, joint stiffness, muscle rigidity, muscle spasms, muscle tightness, muscle twitching, nuchal rigidity

**Nervous system disorders:** bradykinesia, cerebrovascular accident, cogwheel rigidity, convulsion, dizziness postural, drooling, dysarthria, dyskinesia, dystonia, hypertonia, lethargy, oromandibular dystonia, parkinsonism, psychomotor hyperactivity, syncope

**Psychiatric disorders:** insomnia, libido decreased, restlessness

**Reproductive system and breast disorders:** amenorrhea, breast discharge, breast enlargement/breast swelling, breast tenderness/breast pain, ejaculation disorder, erectile dysfunction, galactorrhea, gynecomastia, menstrual disorder, menstruation delayed, menstruation irregular, sexual dysfunction

**Respiratory, thoracic and mediastinal disorders:** nasal congestion

**Skin and subcutaneous tissue disorders:** drug eruption, pruritus, pruritus generalized, rash, urticaria

**Demographic Differences**

An examination of population subgroups in the double-blind placebo-controlled trials did not reveal any evidence of differences in safety on the basis of age, gender, or race alone; however, there were few subjects 65 years of age and older.

**Extrapyramidal Symptoms (EPS)**

Pooled data from the two double-blind, placebo-controlled, 13-week, fixed-dose trials in adult subjects with schizophrenia provided information regarding EPS. Several methods were used to measure EPS: (1) the Simpson-Angus global score which broadly evaluates parkinsonism, (2) the Barnes Akathisia Rating Scale global clinical rating score which evaluates akathisia, (3) the Abnormal Involuntary Movement Scale scores which evaluates dyskinesia, and (4) use of anticholinergic medications to treat EPS (Table 7), and (5) incidence of spontaneous reports of EPS (Table 8).

**Table 7: Extrapyramidal Symptoms (EPS) Assessed by Incidence of Rating Scales and Use of Anticholinergic Medication – Schizophrenia Studies in Adults**

| Scale                                           | Percentage of Subjects |                  |                  |                   |
|-------------------------------------------------|------------------------|------------------|------------------|-------------------|
|                                                 | Placebo<br>(N=262)     | 39 mg<br>(N=130) | 78 mg<br>(N=223) | 156 mg<br>(N=228) |
| Parkinsonism <sup>a</sup>                       | 9                      | 12               | 10               | 6                 |
| Akathisia <sup>b</sup>                          | 5                      | 5                | 6                | 5                 |
| Dyskinesia <sup>c</sup>                         | 3                      | 4                | 6                | 4                 |
| Use of Anticholinergic Medications <sup>d</sup> | 12                     | 10               | 12               | 11                |

<sup>a</sup> For parkinsonism, percent of subjects with Simpson-Angus Total score > 0.3 at endpoint (Total score defined as total sum of items score divided by the number of items)

<sup>b</sup> For Akathisia, percent of subjects with Barnes Akathisia Rating Scale global score ≥ 2 at endpoint

<sup>c</sup> For Dyskinesia, percent of subjects with a score ≥ 3 on any of the first 7 items or a score ≥ 2 on two or more of any of the first 7 items of the Abnormal Involuntary Movement Scale at endpoint

<sup>d</sup> Percent of subjects who received anticholinergic medications to treat EPS

**Table 8: Extrapyramidal Symptoms (EPS)-Related Events by MedDRA Preferred Term – Schizophrenia Studies in Adults**

| EPS Group                                                      | Percentage of Subjects |                  |                  |                   |
|----------------------------------------------------------------|------------------------|------------------|------------------|-------------------|
|                                                                | Placebo<br>(N=262)     | 39 mg<br>(N=130) | 78 mg<br>(N=223) | 156 mg<br>(N=228) |
| Overall percentage of subjects with EPS-related adverse events | 10                     | 12               | 11               | 11                |
| Parkinsonism                                                   | 5                      | 6                | 6                | 4                 |
| Hyperkinesia                                                   | 2                      | 2                | 2                | 4                 |
| Tremor                                                         | 3                      | 2                | 2                | 3                 |
| Dyskinesia                                                     | 1                      | 2                | 3                | 1                 |
| Dystonia                                                       | 0                      | 1                | 1                | 2                 |

Parkinsonism group includes: Extrapyramidal disorder, hypertonia, musculoskeletal stiffness, parkinsonism, drooling, masked facies, muscle tightness, hypokinesia

**INVEGA SUSTENNA®** (paliperidone palmitate)  
extended-release injectable suspension, for intramuscular use

Hyperkinesia group includes: Akathisia, restless legs syndrome, restlessness  
Dyskinesia group includes: Dyskinesia, choreoathetosis, muscle twitching, myoclonus, tardive dyskinesia

Dystonia group includes: Dystonia, muscle spasms

The results across all phases of the maintenance trial in subjects with schizophrenia exhibited comparable findings. In the 9-week, fixed-dose, double-blind, placebo-controlled trial, the proportions of parkinsonism and akathisia assessed by incidence of rating scales were higher in the INVEGA SUSTENNA® 156 mg group (18% and 11%, respectively) than in the INVEGA SUSTENNA® 78 mg group (9% and 5%, respectively) and placebo group (7% and 4%, respectively).

In the 13-week study in subjects with schizophrenia involving 234 mg initiation dosing, the incidence of any EPS was similar to that of the placebo group (8%), but exhibited a dose-related pattern with 6%, 10%, and 11% in the INVEGA SUSTENNA® 234/39 mg, 234/156 mg, and 234/234 mg groups, respectively. Hyperkinesia was the most frequent category of EPS-related adverse events in this study, and was reported at a similar rate between the placebo (4.9%) and INVEGA SUSTENNA® 234/156 mg (4.8%) and 234/234 mg (5.5%) groups, but at a lower rate in the 234/39 mg group (1.3%).

In the long-term study in subjects with schizoaffective disorder, EPS reported during the 25-week open-label INVEGA SUSTENNA® treatment included hyperkinesia (12.3%), parkinsonism (8.7%), tremor (3.4%), dyskinesia (2.5%), and dystonia (2.1%). During the 15-month double-blind treatment, the incidence of any EPS was similar to that of the placebo group (8.5% and 7.1% respectively). The most commonly reported treatment-emergent EPS-related adverse events (>2%) in any treatment group in the double-blind phase of the study (INVEGA SUSTENNA® versus placebo) were hyperkinesia (3.7% vs. 2.9%), parkinsonism (3.0% vs. 1.8%), and tremor (1.2% vs. 2.4%).

**Dystonia**

Symptoms of dystonia, prolonged abnormal contractions of muscle groups, may occur in susceptible individuals during the first few days of treatment. Dystonic symptoms include: spasm of the neck muscles, sometimes progressing to tightness of the throat, swallowing difficulty, difficulty breathing, and/or protrusion of the tongue. While these symptoms can occur at low doses, they occur more frequently and with greater severity with high potency and at higher doses of first generation antipsychotic drugs. An elevated risk of acute dystonia is observed in males and younger age groups.

**Pain Assessment and Local Injection Site Reactions**

In the pooled data from the two 13-week, fixed-dose, double-blind, placebo-controlled trials in subjects with schizophrenia, the mean intensity of injection pain reported by subjects using a visual analog scale (0 = no pain to 100 = unbearably painful) decreased in all treatment groups from the first to the last injection (placebo: 10.9 to 9.8; 39 mg: 10.3 to 7.7; 78 mg: 10.0 to 9.2; 156 mg: 11.1 to 8.8). The results from both the 9-week, fixed-dose, double-blind, placebo-controlled trial and the double-blind phase of the maintenance trial exhibited comparable findings.

In the 13-week study involving 234 mg initiation dosing in subjects with schizophrenia, occurrences of induration, redness, or swelling, as assessed by blinded study personnel, were infrequent, generally mild, decreased over time, and similar in incidence between the INVEGA SUSTENNA® and placebo groups. Investigator ratings of injection pain were similar for the placebo and INVEGA SUSTENNA® groups. Investigator evaluations of the injection site after the first injection for redness, swelling, induration, and pain were rated as absent for 69-100% of subjects in both the INVEGA SUSTENNA® and placebo groups. At Day 92, investigators rated absence of redness, swelling, induration, and pain in 95-100% of subjects in both the INVEGA SUSTENNA® and placebo groups.

**Additional Adverse Reactions Reported in Clinical Trials with Oral Paliperidone**

The following is a list of additional adverse reactions that have been reported in clinical trials with oral paliperidone:

**Cardiac disorders:** bundle branch block left, sinus arrhythmia

**Gastrointestinal disorders:** abdominal pain, small intestinal obstruction

**General disorders and administration site conditions:** edema, edema peripheral

**Immune system disorders:** anaphylactic reaction

**Infections and infestations:** rhinitis

**Musculoskeletal and connective tissue disorders:** musculoskeletal pain, torticollis, trismus

**Nervous system disorders:** grand mal convulsion, parkinsonian gait, transient ischemic attack

**Psychiatric disorders:** sleep disorder

**Reproductive system and breast disorders:** breast engorgement

**Respiratory, thoracic and mediastinal disorders:** pharyngolaryngeal pain, pneumonia aspiration

**Skin and subcutaneous tissue disorders:** rash papular

**Vascular disorders:** hypotension, ischemia

**INVEGA SUSTENNA®** (paliperidone palmitate)  
extended-release injectable suspension, for intramuscular use

#### Postmarketing Experience

The following adverse reactions have been identified during postapproval use of paliperidone; because these reactions were reported voluntarily from a population of uncertain size, it is not always possible to reliably estimate their frequency or establish a causal relationship to drug exposure: angioedema, cataplexy, ileus, somnambulism, swollen tongue, thrombotic thrombocytopenic purpura, urinary incontinence, and urinary retention.

Cases of anaphylactic reaction after injection with INVEGA SUSTENNA® have been reported during postmarketing experience in patients who have previously tolerated oral risperidone or oral paliperidone.

Paliperidone is the major active metabolite of risperidone. Adverse reactions reported with oral risperidone and risperidone long-acting injection can be found in the *Adverse Reactions* sections of the package inserts for those products.

#### DRUG INTERACTIONS

##### Drugs Having Clinically Important Interactions with INVEGA SUSTENNA®

Because paliperidone palmitate is hydrolyzed to paliperidone [see *Clinical Pharmacology (12.3) in Full Prescribing Information*], results from studies with oral paliperidone should be taken into consideration when assessing drug-drug interaction potential.

**Table 9. Clinically Important Drug Interactions with INVEGA SUSTENNA®**

| Concomitant Drug Name or Drug Class                                                    | Clinical Rationale                                                                                                                                                                                                                                 | Clinical Recommendation                                                                                                                                                                                                                                                                                                 |
|----------------------------------------------------------------------------------------|----------------------------------------------------------------------------------------------------------------------------------------------------------------------------------------------------------------------------------------------------|-------------------------------------------------------------------------------------------------------------------------------------------------------------------------------------------------------------------------------------------------------------------------------------------------------------------------|
| Centrally Acting Drugs and Alcohol                                                     | Given the primary CNS effects of paliperidone, concomitant use of centrally acting drugs and alcohol may modulate the CNS effects of INVEGA SUSTENNA®.                                                                                             | INVEGA SUSTENNA® should be used with caution in combination with other centrally acting drugs and alcohol [see <i>Adverse Reactions</i> ].                                                                                                                                                                              |
| Drugs with Potential for Inducing Orthostatic Hypotension                              | Because INVEGA SUSTENNA® has the potential for inducing orthostatic hypotension, an additive effect may occur when INVEGA SUSTENNA® is administered with other therapeutic agents that have this potential [see <i>Warnings and Precautions</i> ]. | Monitor orthostatic vital signs in patients who are vulnerable to hypotension [see <i>Warnings and Precautions</i> ].                                                                                                                                                                                                   |
| Strong Inducers of CYP3A4 and P-gp (e.g., carbamazepine, rifampin, or St. John's Wort) | The concomitant use of paliperidone and strong inducers of CYP3A4 and P-gp may decrease the exposure of paliperidone [see <i>Clinical Pharmacology (12.3) in Full Prescribing Information</i> ].                                                   | Avoid using CYP3A4 and/or P-gp inducers with INVEGA SUSTENNA® during the 1-month dosing interval, if possible. If administering a strong inducer is necessary, consider managing the patient using paliperidone extended-release tablets [see <i>Dosage and Administration (2.5) in Full Prescribing Information</i> ]. |
| Levodopa and Other Dopamine Agonists                                                   | Paliperidone may antagonize the effect of levodopa and other dopamine agonists.                                                                                                                                                                    | Monitor and manage patient as clinically appropriate.                                                                                                                                                                                                                                                                   |

##### Drugs Having No Clinically Important Interactions with INVEGA SUSTENNA®

Clinically meaningful pharmacokinetic interaction between INVEGA SUSTENNA® and valproate (including valproic acid and divalproex sodium) is not expected. Based on pharmacokinetic studies with oral paliperidone, no dosage adjustment of INVEGA SUSTENNA® is required when administered with valproate [see *Clinical Pharmacology (12.3) in Full Prescribing Information*]. Additionally, no dosage adjustment is necessary for valproate when co-administered with INVEGA SUSTENNA® [see *Clinical Pharmacology (12.3) in Full Prescribing Information*].

Pharmacokinetic interaction between lithium and INVEGA SUSTENNA® is also unlikely.

Paliperidone is not expected to cause clinically important pharmacokinetic interactions with drugs that are metabolized by cytochrome P450 isozymes. *In vitro* studies indicate that CYP2D6 and CYP3A4 may be involved in paliperidone metabolism; however, there is no evidence *in vivo* that inhibitors of these enzymes significantly affect the metabolism of paliperidone. Paliperidone is not a substrate of CYP1A2, CYP2A6, CYP2C9, and CYP2C19; an interaction with inhibitors or inducers of these isozymes is unlikely. [see *Clinical Pharmacology (12.3) in Full Prescribing Information*]

**INVEGA SUSTENNA®** (paliperidone palmitate)  
extended-release injectable suspension, for intramuscular use

#### USE IN SPECIFIC POPULATIONS

##### Pregnancy

###### Pregnancy Exposure Registry

There is a pregnancy exposure registry that monitors pregnancy outcomes in women exposed to atypical antipsychotics, including INVEGA SUSTENNA®, during pregnancy. Healthcare providers are encouraged to register patients by contacting the National Pregnancy Registry for Atypical Antipsychotics at 1-866-961-2388 or online at <http://womensmentalhealth.org/clinical-and-research-programs/pregnancyregistry/>.

###### Risk Summary

Neonates exposed to antipsychotic drugs during the third trimester of pregnancy are at risk for extrapyramidal and/or withdrawal symptoms following delivery [see *Clinical Considerations*]. Overall, available data from published epidemiologic studies of pregnant women exposed to paliperidone have not established a drug-associated risk for major birth defects, miscarriage, or adverse maternal or fetal outcomes [see *Data*]. There are risks to the mother associated with untreated schizophrenia and with exposure to antipsychotics, including INVEGA SUSTENNA®, during pregnancy [see *Clinical Considerations*]. Paliperidone has been detected in plasma in adult subjects up to 126 days after a single-dose administration of INVEGA SUSTENNA® [see *Clinical Pharmacology (12.3) in Full Prescribing Information*], and the clinical significance of INVEGA SUSTENNA® administered before pregnancy or anytime during pregnancy is not known.

The estimated background risk of major birth defects and miscarriage for the indicated population is unknown. All pregnancies have a background risk of birth defects, loss, or other adverse outcomes. In the U.S. general population, the estimated background risk of major birth defects and miscarriage in clinically recognized pregnancies is 2-4% and 15-20%, respectively.

In animal reproduction studies, there were no treatment related effects on the offspring when pregnant rats were injected intramuscularly with paliperidone palmitate during the period of organogenesis at doses up to 10 times the maximum recommended human dose (MRHD) of 234 mg paliperidone based on mg/m<sup>2</sup> body surface area. There were no increases in fetal abnormalities when pregnant rats and rabbits were treated orally with paliperidone during the period of organogenesis with up to 8 times the MRHD of 12 mg of paliperidone based on mg/m<sup>2</sup> body surface area. Additional reproduction toxicity studies were conducted with orally administered risperidone, which is extensively converted to paliperidone (see Animal data).

###### Clinical Considerations

###### Disease-associated maternal and/or embryo/fetal risk

There is a risk to the mother from untreated schizophrenia, including increased risk of relapse, hospitalization, and suicide. Schizophrenia and bipolar I disorder are associated with increased adverse perinatal outcomes, including preterm birth. It is not known if this is a direct result of the illness or other comorbid factors.

###### Fetal/Neonatal Adverse Reactions

Extrapyramidal and/or withdrawal symptoms, including agitation, hypotonia, hypotonia, tremor, somnolence, respiratory distress, and feeding disorder have been reported in neonates who were exposed to antipsychotic drugs, including INVEGA SUSTENNA®, during the third trimester of pregnancy. These symptoms have varied in severity. Monitor neonates exhibiting extrapyramidal and/or withdrawal symptoms and manage symptoms appropriately. Some neonates recovered within hours or days without specific treatment; others required prolonged hospitalization.

###### Data

###### Human Data

Published data from observational studies, birth registries, and case reports on the use of atypical antipsychotics during pregnancy do not report a clear association with antipsychotics and major birth defects. A prospective observational study including 6 women treated with risperidone, the parent compound of paliperidone, demonstrated placental passage of risperidone and paliperidone. A retrospective cohort study from a Medicaid database of 9258 women exposed to antipsychotics during pregnancy did not indicate an overall increased risk for major birth defects. There was a small increase in the risk of major birth defects (RR= 1.26, 95% CI 1.02-1.56) and of cardiac malformations (RR=1.26, 95% CI 0.88-1.81) in a subgroup of 1566 women exposed to the parent compound of paliperidone, risperidone, during the first trimester of pregnancy; however, there is no mechanism of action to explain the difference in malformation rates.

###### Animal Data

There were no treatment-related effects on the offspring when pregnant rats were injected intramuscularly with paliperidone palmitate extended-release injectable suspension during the period of organogenesis at doses up to 250 mg/kg, which is 10 times MRHD of 234 mg paliperidone based on mg/m<sup>2</sup> body surface area.

In animal reproduction studies, there were no increases in fetal abnormalities when pregnant rats and rabbits were treated orally with paliperidone during the period of organogenesis with up to 8 times the MRHD of 12 mg based on mg/m<sup>2</sup> body surface area.



**INVEGA SUSTENNA®** (paliperidone palmitate)  
extended-release injectable suspension, for intramuscular use

Additional reproduction toxicity studies were conducted with orally administered risperidone, which is extensively converted to paliperidone. Cleft palate was observed in the offspring of pregnant mice treated with risperidone at 3 to 4 times the MRHD of 16 mg based on mg/m<sup>2</sup> body surface area; maternal toxicity occurred at 4 times the MRHD. There was no evidence of teratogenicity in embryofetal developmental toxicity studies with risperidone in rats and rabbits at doses up to 6 times the MRHD of 16 mg/day risperidone based on mg/m<sup>2</sup> body surface area. When the offspring of pregnant rats, treated with risperidone at 0.6 times the MRHD based on mg/m<sup>2</sup> body surface area, reached adulthood, learning was impaired. Increased neuronal cell death occurred in the fetal brains of the offspring of pregnant rats treated at 0.5 to 1.2 times the MRHD; the postnatal development and growth of the offspring was delayed.

In rat reproduction studies with risperidone, pup deaths occurred at oral doses which are less than the MRHD of risperidone based on mg/m<sup>2</sup> body surface area; it is not known whether these deaths were due to a direct effect on the fetuses or pups or, to effects on the dams (see RISPEDAL® package insert).

**Lactation**

**Risk Summary**

Limited data from published literature report the presence of paliperidone in human breast milk. There is no information on the effects on the breastfed infant or the effects on milk production; however, there are reports of sedation, failure to thrive, jitteriness, and extrapyramidal symptoms (tremors and abnormal muscle movements) in breastfed infants exposed to paliperidone's parent compound, risperidone (see *Clinical Considerations*). Paliperidone has been detected in plasma in adult subjects up to 126 days after a single-dose administration of INVEGA SUSTENNA® [see *Clinical Pharmacology (12.3) in Full Prescribing Information*], and the clinical significance on the breastfed infant is not known. The developmental and health benefits of breastfeeding should be considered along with the mother's clinical need for INVEGA SUSTENNA® and any potential adverse effects on the breastfed child from INVEGA SUSTENNA® or from the mother's underlying condition.

**Clinical Considerations**

Infants exposed to INVEGA SUSTENNA® through breastmilk should be monitored for excess sedation, failure to thrive, jitteriness, and extrapyramidal symptoms (tremors and abnormal muscle movements).

**Females and Males of Reproductive Potential**

**Infertility**

**Females**

Based on the pharmacologic action of paliperidone (D2 receptor antagonism), treatment with INVEGA SUSTENNA® may result in an increase in serum prolactin levels, which may lead to a reversible reduction in fertility in females of reproductive potential [see *Warnings and Precautions (5.10)*].

**Pediatric Use**

Safety and effectiveness of INVEGA SUSTENNA® in patients < 18 years of age have not been established.

**Juvenile Animal Studies**

In a study in which juvenile rats were treated with oral paliperidone from days 24 to 73 of age, a reversible impairment of performance in a test of learning and memory was seen, in females only, with a no-effect dose of 0.63 mg/kg/day, which produced plasma levels (AUC) of paliperidone similar to those in adolescents dosed at 12 mg/day. No other consistent effects on neurobehavioral or reproductive development were seen up to the highest dose tested (2.5 mg/kg/day), which produced plasma levels of paliperidone 2-3 times those in adolescents.

Juvenile dogs were treated for 40 weeks with oral risperidone, which is extensively metabolized to paliperidone in animals and humans, at doses of 0.31, 1.25, or 5 mg/kg/day. Decreased bone length and density were seen with a no-effect dose of 0.31 mg/kg/day, which produced plasma levels (AUC) of risperidone plus paliperidone which were similar to those in children and adolescents receiving the MRHD of risperidone. In addition, a delay in sexual maturation was seen at all doses in both males and females. The above effects showed little or no reversibility in females after a 12-week drug-free recovery period.

The long-term effects of INVEGA SUSTENNA® on growth and sexual maturation have not been fully evaluated in children and adolescents.

**Geriatric Use**

Clinical studies of INVEGA SUSTENNA® did not include sufficient numbers of subjects aged 65 and over to determine whether they respond differently from younger subjects. Other reported clinical experience has not identified differences in responses between the elderly and younger patients.

This drug is known to be substantially excreted by the kidney and clearance is decreased in patients with renal impairment [see *Clinical Pharmacology (12.3) in Full Prescribing Information*], who should be given reduced doses. Because elderly patients are more likely to have decreased renal function, adjust dose based on renal function [see *Dosage and Administration (2.5) in Full Prescribing Information*].

**INVEGA SUSTENNA®** (paliperidone palmitate)  
extended-release injectable suspension, for intramuscular use

**Renal Impairment**

Use of INVEGA SUSTENNA® is not recommended in patients with moderate or severe renal impairment (creatinine clearance < 50 mL/min). Dose reduction is recommended for patients with mild renal impairment (creatinine clearance ≥ 50 mL/min to < 80 mL/min) [see *Dosage and Administration (2.5) and Clinical Pharmacology (12.3) in Full Prescribing Information*].

**Hepatic Impairment**

INVEGA SUSTENNA® has not been studied in patients with hepatic impairment. Based on a study with oral paliperidone, no dose adjustment is required in patients with mild or moderate hepatic impairment. Paliperidone has not been studied in patients with severe hepatic impairment [see *Clinical Pharmacology (12.3) in Full Prescribing Information*].

**Patients with Parkinson's Disease or Lewy Body Dementia**

Patients with Parkinson's Disease or Dementia with Lewy Bodies can experience increased sensitivity to INVEGA SUSTENNA®. Manifestations can include confusion, obtundation, postural instability with frequent falls, extrapyramidal symptoms, and clinical features consistent with neuroleptic malignant syndrome.

**DRUG ABUSE AND DEPENDENCE**

**Controlled Substance**

INVEGA SUSTENNA® (paliperidone) is not a controlled substance.

**Abuse**

Paliperidone has not been systematically studied in animals or humans for its potential for abuse.

**Dependence**

Paliperidone has not been systematically studied in animals or humans for its potential for tolerance or physical dependence.

**OVERDOSAGE**

**Human Experience**

No cases of overdose were reported in premarketing studies with INVEGA SUSTENNA®. Because INVEGA SUSTENNA® is to be administered by healthcare professionals, the potential for overdose by patients is low.

While experience with paliperidone overdose is limited, among the few cases of overdose reported in premarketing trials with oral paliperidone, the highest estimated ingestion was 405 mg. Observed signs and symptoms included extrapyramidal symptoms and gait unsteadiness. Other potential signs and symptoms include those resulting from an exaggeration of paliperidone's known pharmacological effects, i.e., drowsiness and sedation, tachycardia and hypotension, and QT prolongation. Torsades de pointes and ventricular fibrillation have been reported in a patient in the setting of overdose with oral paliperidone.

Paliperidone is the major active metabolite of risperidone. Overdose experience reported with risperidone can be found in the *OVERDOSAGE* section of the risperidone package insert.

**Management of Overdosage**

Contact a Certified Poison Control Center for the most up to date information on the management of INVEGA SUSTENNA® overdose (1-800-222-1222 or www.poisson.org). Provide supportive care, including close medical supervision and monitoring. Treatment should consist of general measures employed in the management of overdose with any drug. Consider the possibility of multiple drug overdose. Ensure an adequate airway, oxygenation, and ventilation. Monitor cardiac rhythm and vital signs. Use supportive and symptomatic measures. There is no specific antidote to paliperidone.

Consider the prolonged-release characteristics of INVEGA SUSTENNA® and the long apparent half-life of paliperidone when assessing treatment needs and recovery.

INVEGA SUSTENNA® (paliperidone palmitate) Extended-Release Injectable Suspension

Product of Ireland

Manufactured by:  
Janssen Pharmaceutica NV  
Beerse, Belgium

Manufactured for:  
Janssen Pharmaceuticals, Inc.  
Titusville, NJ 08560

© 2009 Janssen Pharmaceutical Companies

cp-78652v2

# THE AMERICAN PSYCHIATRIC ASSOCIATION

800 Maine Avenue, S.W., Suite 900, Washington, D.C. 20024

(888) 357-7924 (toll-free inside the U.S. and Canada)

web site: [www.psychiatry.org](http://www.psychiatry.org) • e-mail: [apa@psych.org](mailto:apa@psych.org)

## Chairpersons of Councils, Committees, and Task Forces

### Standing Committees

|                             |                                 |
|-----------------------------|---------------------------------|
| <b>Bylaws</b>               | Edward R. Herman, J.D., M.D.    |
| <b>Elections</b>            | Justin W. Schoen, M.D.          |
| <b>Ethics</b>               | Charles Dike, M.D.              |
| <b>Finance and Budget</b>   | Ann T. Sullivan, M.D.           |
| <i>Audit</i>                | Ayana Jordan, M.D., Ph.D.       |
| <i>Investment Oversight</i> | Steven S. Sharfstein, M.D.      |
| <b>Joint Reference</b>      | Rebecca W. Brendel, M.D., J.D.  |
| <b>Membership</b>           | Kimberly A. Gordon-Achebe, M.D. |
| <b>Nominating</b>           | Jeffrey L. Geller, M.D., M.P.H. |
| <b>Tellers</b>              | Mariam F. Aboukar, D.O.         |

### Non-Standing Committee

|                             |                               |
|-----------------------------|-------------------------------|
| <b>Conflict of Interest</b> | Sandra M. DeJong, M.D., M.Sc. |
|-----------------------------|-------------------------------|

### Councils

#### Council on Addiction Psychiatry

Smita Das, M.D., M.P.H., Ph.D.

#### Council on Advocacy and Government Relations

Katherine G. Kennedy, M.D.

*Advocacy and Litigation Funding*

Bhasker J. Dave, M.D.

#### Council on Children, Adolescents, and Their Families

Gabrielle Shapiro, M.D.

*Women's Mental Health*

Ludmila B. De Faria, M.D.

#### Council on Communications

Isabel K. Norian, M.D.

#### Council on Consultation-Liaison Psychiatry

Sejal B. Shah, M.D.

#### Council on Geriatric Psychiatry

Maria D. Llorente, M.D.

#### Council on Healthcare Systems and Financing

Robert L. Trestman, M.D., Ph.D.

*Integrated Care*

Benjamin G. Druss, M.D.

*RBRVS, Codes and Reimbursement*

Gregory G. Harris, M.D.

*Reimbursement for Psychiatric Care*

Laurence H. Miller, M.D.

*Telepsychiatry*

James H. Shore, M.D.

#### Council on International Psychiatry and Global Health

David C. Henderson, M.D.

*Chester Pierce Human Rights Award Committee*

Michelle P. Durham, M.D., M.P.H.

#### Council on Medical Education and Lifelong Learning

Eindra Khin Khin, M.D.

*Innovation*

Nina Vasan, M.D.

*Scientific Program*

Catherine C. Crone, M.D.

*Scientific Program—Mental Health Services Conference*

*(Oct. to Oct. tenure)*

Sarah Y. Vinson, M.D.

*Vestermark Award Committee*

Donna Marie Sudak, M.D.

*Well-being and Burnout*

Constance Guille, M.D.

#### Council on Minority Mental Health and Health Disparities

Walter Wilson, Jr., M.D.

#### Council on Psychiatry and Law

Debra A. Pinals, M.D.

*Judicial Action*

Reena Kapoor, M.D.

#### Council on Quality Care

Carol L. Alter, M.D.

*Mental Health Information Technology*

John Torous, M.D.

*Quality and Performance Measurement*

David S. Kroll, M.D.

*Practice Guidelines*

Daniel J. Anzia, M.D.

#### Council on Research

Jonathan E. Alpert, M.D., Ph.D.

*Climate Change and Mental Health*

Elizabeth Haase, M.D.

*Psychiatric Dimensions of Disasters*

Joshua C. Morganstein, M.D.

# ▶ PODCASTS from APA Publishing

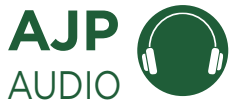

## AJP Audio

Host: Michael D. Roy, Executive Editor, *The American Journal of Psychiatry*

Each episode features an in-depth interview with an author from the most discussed article appearing in the latest issue of *The American Journal of Psychiatry*.

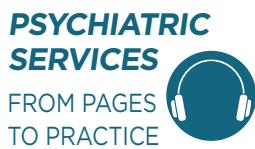

## Psychiatric Services From Pages to Practice

Hosts: Lisa Dixon, M.D., M.P.H., Editor, *Psychiatric Services*, and Josh Berezin, M.D., M.S.

Learn about the latest mental health services research published in *Psychiatric Services* and why it is relevant. Topics include community-based treatment programs, collaborative care, evidence-based treatment and service delivery, criminal and social justice, policy analysis, and more.

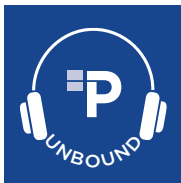

## Psychiatry Unbound

Host: Laura Roberts, M.D., M.A., Editor-in-Chief, APA Publishing Books

APA Publishing's Books podcast offers the opportunity to hear the voices behind the most prominent psychiatric scholarship in the field today. Learn about important topics in the field of psychiatry and see how our authors are making an impact in clinical settings throughout the world.

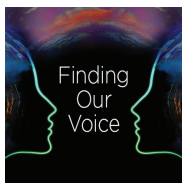

## Finding Our Voice

Host: Sanya Virani, MBBS, MPH

*Finding Our Voice* brings the viewpoints and opinions of the next generation of psychiatrists—including residents, fellows, and early career psychiatrists—to the forefront. Topics covered include systemic racism and social determinants.

Subscribe Today!

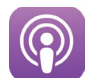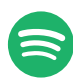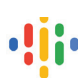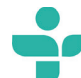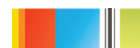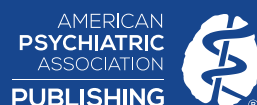

# Go Online

Visit [ajp.psychiatryonline.org](http://ajp.psychiatryonline.org) for these features!

## AJP in Advance

*Discover the latest research advances before they appear in print*

### **Cell-Type-Specific Impact of Glucocorticoid Receptor Activation on the Developing Brain: A Cerebral Organoid Study**

Stress hormones—either synthetic glucocorticoids given to speed up organ maturation or endogenous cortisol from the mother—can shape how the brain develops in the womb, either by slowing down or hastening maturation of neurons. This could contribute to vulnerability for neurodevelopmental disorders in early childhood and mental illness later in life.

## AJP Audio Podcast

Daniel Weinberger and Giovanna Punzi discuss their article “Genetics and Brain Transcriptomics of Completed Suicide” (p. 226) in which they report that individuals who die by suicide by violent means may represent a unique group of individuals genetically distinct from people who die by less violent means.

## AJP CME

*Earn CME credit: 3 courses per issue*

You can earn CME credits by reading articles in *The American Journal of Psychiatry*. Three articles in this issue form a short course that consists of reading the article and answering three multiple-choice questions with a single correct answer for up to 1 AMA PRA Category 1 Credit™ each. Credit is issued only to subscribers of the online AJP CME Course Program.

See the table below for the articles in this month’s issue that are the subject of a CME quiz.

### **In this issue**

---

Putting Genetics to Work in the Psychiatric Clinic (p. 182)

---

The Genetic Architecture of Obsessive-Compulsive Disorder: Contribution of Liability to OCD From Alleles Across the Frequency Spectrum (p. 216)

---

Genetics and Brain Transcriptomics of Completed Suicide (p. 226)

---

@APAPubJournals

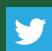

Psychiatry Online

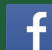

AMERICAN  
PSYCHIATRIC  
ASSOCIATION  
PUBLISHING

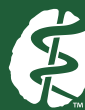

[www.appi.org](http://www.appi.org)  
1-800-368-5777  
[appi@psych.org](mailto:appi@psych.org)

Coming March 2022!

## Diagnostic and Statistical Manual of Mental Disorders, Fifth Edition, Text Revision (DSM-5-TR™)

American Psychiatric Association

The *Diagnostic and Statistical Manual of Mental Disorders*, Fifth Edition, Text Revision (DSM-5-TR), is the most comprehensive, current, and critical resource for clinical practice available to today's mental health clinicians and researchers. DSM-5-TR includes the fully revised text and references, updated diagnostic criteria and ICD-10-CM codes since DSM-5 was published in 2013. It features a new disorder, Prolonged Grief Disorder, as well as codes for suicidal behavior available to all clinicians of any discipline without the requirement of any other diagnosis.

With contributions from over 200 subject matter experts, this updated volume boasts the most current text updates based on the scientific literature. Now in four-color and with the ability to authenticate each printed copy, DSM-5-TR provides a cohesive, updated presentation of criteria, diagnostic codes, and text. This latest volume offers a common language for clinicians involved in the diagnosis and study of mental disorders and facilitates an objective assessment of symptom presentations across a variety of clinical settings—inpatient, outpatient, partial hospital, consultation-liaison, clinical, private practice, and primary care.

2022 • 1,250 pages • ISBN 978-0-89042-575-6 • Hardcover • \$220.00 • Item #2575

2022 • 1,250 pages • ISBN 978-0-89042-576-3 • Paperback • \$170.00 • Item #2576

2022 • 1,250 pages • ISBN 978-0-89042-577-0 • eBook • \$136.00 • Item #2577

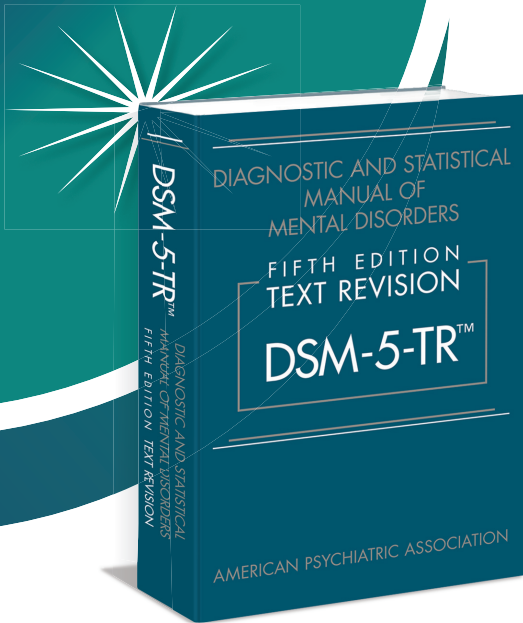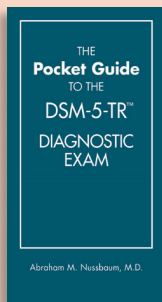

### The Pocket Guide to the DSM-5-TR® Diagnostic Exam

Abraham M. Nussbaum, M.D., M.T.S.

2022 • 295 pages  
ISBN 978-1-61537-357-4  
Paperback • \$75.00 • Item #37357

2022 • 295 pages  
ISBN 978-1-61537-358-1  
eBook • \$60.00 • Item #37358

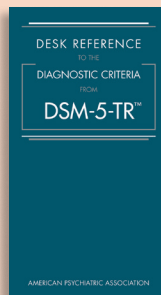

### Desk Reference to the Diagnostic Criteria from DSM-5-TR®

American Psychiatric Association

2022 • 450 pages  
ISBN 978-0-89042-579-4  
Paperback • \$75.00 • Item #2579

2022 • 450 pages  
ISBN 978-0-89042-580-0  
Spiralbound • \$75.00 • Item #2580

2022 • 450 pages  
ISBN 978-0-89042-581-7  
eBook • \$60.00 • Item #2581

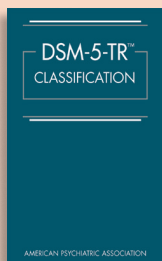

### DSM-5-TR® Classification

American Psychiatric Association

2022 • 150 pages  
ISBN 978-0-89042-583-1  
Spiralbound • \$35.00 • Item #2583

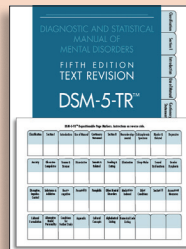

### DSM-5-TR® Repositionable Page Markers

American Psychiatric Association

2022 • 1 page  
ISBN 978-0-89042-582-4  
Repositionable Page Markers  
\$12.50 • Item #2582

AMERICAN  
PSYCHIATRIC  
ASSOCIATION  
PUBLISHING

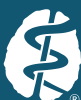

20% Discount for American Psychiatric Association Members

25% Discount for APA Resident-Fellow Members

▶ ORDER @ [www.appi.org](http://www.appi.org) | Email: [appi@psych.org](mailto:appi@psych.org) | Toll Free: 1-800-368-5777

# YOU CAN SAVE LIVES.

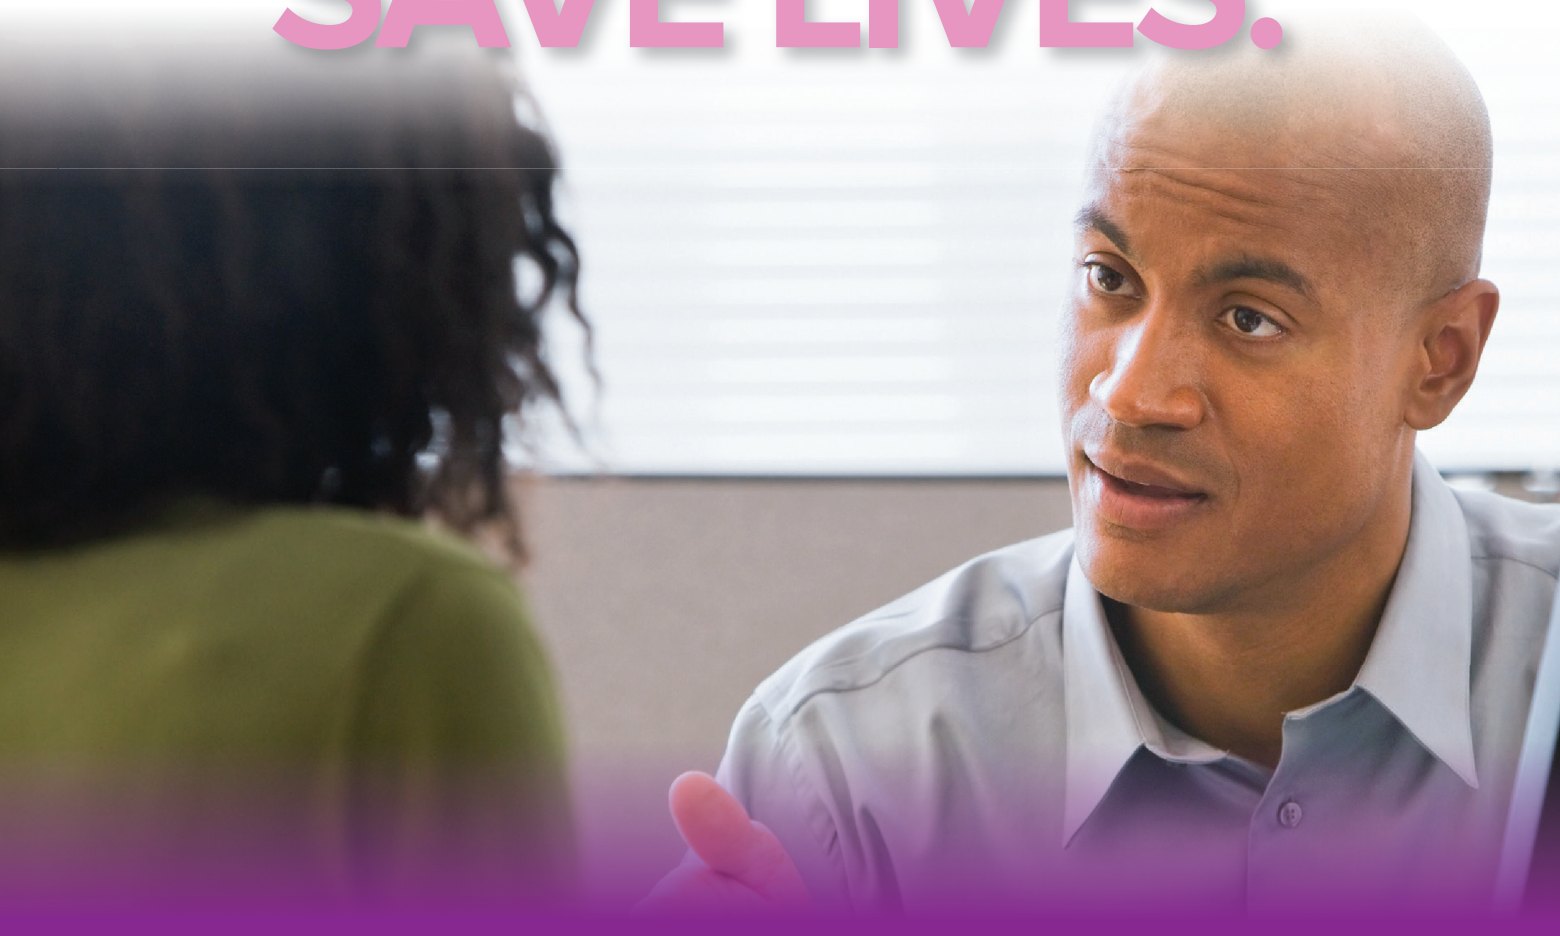

Treating tobacco use is an important part of mental health treatment.

Double your patients' chances of quitting with counseling and medication.

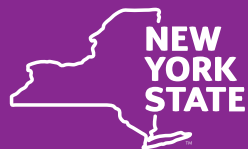

Department  
of Health

[TalkToYourPatients.health.ny.gov](http://TalkToYourPatients.health.ny.gov)

U.S. Dept. of Health and Human Services, Public Health Service, Treating Tobacco Use and Dependence  
Clinical Practice Guideline 2008 Update
