# The American Journal of Psychiatry

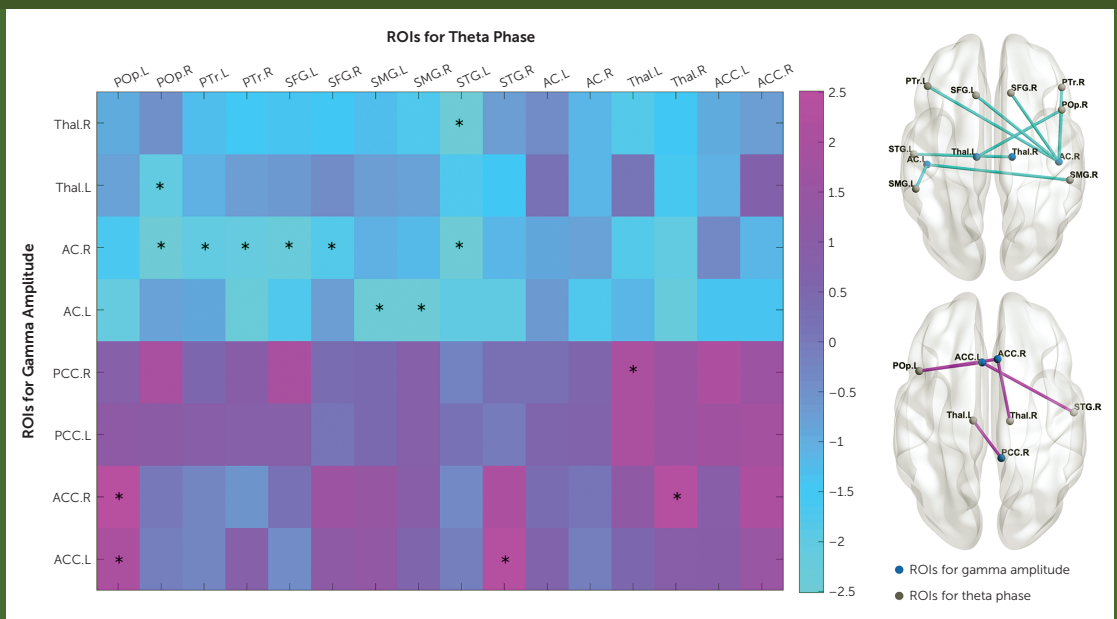

Putting Genetics to Work in the Psychiatric Clinic

Aberrant Developmental Patterns of Gamma-Band Response  
and Long-Range Communication Disruption in Youths  
With 22q11.2 Deletion Syndrome

The Genetic Architecture of Obsessive-Compulsive Disorder

Genetics and Brain Transcriptomics of Completed Suicide

Interindividual Differences in Cortical Thickness  
and Their Genomic Underpinnings in  
Autism Spectrum Disorder
